# Supplementary material for: Oral Health and Frailty in Community-Dwelling Older Adults in the Northern Netherlands: A Cross-Sectional Study
Source: MDPI journal article supplement (doi:10.3390/ijerph19137654), 2022-06-23
Supplement: s1 [file s1]

Online Supplement Table S2 Oral Health Impact Profile-14 questionnaire items, English version

| Items | Question                                                                                                                                                |
|-------|---------------------------------------------------------------------------------------------------------------------------------------------------------|
| 1     | Have you had trouble pronouncing certain words because of problems with your teeth, mouth or dentures?                                                  |
| 2     | Have you felt that your sense of taste has worsened because of problems with your teeth, mouth or dentures?                                             |
| 3     | Have you had pain aching in your mouth?                                                                                                                 |
| 4     | Have you found it uncomfortable to eat any foods because of problems with your teeth, mouth or dentures?                                                |
| 5     | Have you been self-conscious because of your teeth, mouth or dentures?                                                                                  |
| 6     | Have you felt tense because of your teeth, mouth or dentures?                                                                                           |
| 7     | Has your diet been unsatisfactory because of your teeth, mouth or dentures?                                                                             |
| 8     | Have you had to interrupt meals because of problems with your teeth, mouth or dentures?                                                                 |
| 9     | Have you found it difficult to relax because of problems with your teeth, mouth or dentures?                                                            |
| 10    | Have you been a bit embarrassed because of problems with your teeth, mouth or dentures?                                                                 |
| 11    | Have you been a bit irritable with other people because of problems with your teeth, mouth or dentures?                                                 |
| 12    | Have you had difficulty doing your usual jobs because of problems with your teeth, mouth or dentures?                                                   |
| 13    | Have you felt that life in general was less satisfying because of problems with your teeth, mouth or dentures? Have you been totally unable to function |
| 14    | Have you been totally unable to function because of your problems with your teeth, mouth or dentures?                                                   |
